# Supplementary material
Source: PubMed Central journal article supplement (PMC7403101)
Supplement: mmc1.pdf [file mmc1.pdf]

eTable 1. Search algorithms used in the various databases

| Database           | Search String                                                                                                                                                                                                                                                                                                                                                                                                                                                                                                                                                                                                                                                                                                                                                                                                                                                                                                                                                             |
|--------------------|---------------------------------------------------------------------------------------------------------------------------------------------------------------------------------------------------------------------------------------------------------------------------------------------------------------------------------------------------------------------------------------------------------------------------------------------------------------------------------------------------------------------------------------------------------------------------------------------------------------------------------------------------------------------------------------------------------------------------------------------------------------------------------------------------------------------------------------------------------------------------------------------------------------------------------------------------------------------------|
| MEDLINE            | <i>((("Macular Degeneration"[Mesh] OR (macular AND degeneration) OR amd OR namd)) AND (ranibizumab OR lucentis OR aflibercept OR eylea OR bevacizumab OR avastin OR "Receptors, Vascular Endothelial Growth Factor/antagonists and inhibitors"[Mesh] OR anti-vegf OR intravitreal)) AND (adherence OR compliance OR persistence OR non-adherence OR nonadherence OR non-compliance OR noncompliance OR non-persistence OR nonpersistence OR dropout OR barrier OR barriers OR education OR caregiver OR experience OR burden OR patient preference OR patient preferences OR discontinuation OR expectation* OR satisfaction))</i>                                                                                                                                                                                                                                                                                                                                        |
| EMBASE             | <i>('macular degeneration' OR exudative OR wet OR neovascular OR (age NEXT/1 related) OR 'amd'/exp OR amd) AND ('ranibizumab'/exp OR 'ranibizumab' OR 'aflibercept'/exp OR 'aflibercept' OR 'bevacizumab'/exp OR 'bevacizumab' OR 'vasculotropin inhibitor'/exp OR 'vasculotropin inhibitor' OR 'intravitreal drug administration' OR 'anti vegf') AND ('adherence'/exp OR adherence OR 'patient compliance' OR 'persistence'/exp OR persistence OR nonadherence OR 'non adherence' OR 'non persistence' OR 'medication compliance'/exp OR noncompliance OR 'non compliance' OR barrier* OR 'dropout' OR 'education'/exp OR 'education' OR 'caregiver'/exp OR 'caregiver' OR 'patient experience'/exp OR 'patient experience' OR 'burden'/exp OR 'burden' OR 'patient preference'/exp OR 'patient preference' OR discontinuation OR 'expectation'/exp OR 'expectation' OR 'satisfaction'/exp OR 'satisfaction') AND [embase]/lim NOT ([embase]/lim AND [medline]/lim)</i> |
| CENTRAL            | <i>'Macular degeneration' [MESH] AND ('bevacizumab' OR 'ranibizumab' OR 'aflibercept' OR 'intravitreal injections' [MESH]) AND 'Treatment Adherence and Compliance' [MESH]</i>                                                                                                                                                                                                                                                                                                                                                                                                                                                                                                                                                                                                                                                                                                                                                                                            |
| Clinicaltrials.gov | <i>'Wet macular degeneration' or 'Macular degeneration' [condition or disease] AND ('adherence' OR 'compliance' OR 'discontinuation' OR 'dropout')[keyword]</i>                                                                                                                                                                                                                                                                                                                                                                                                                                                                                                                                                                                                                                                                                                                                                                                                           |
| Google Scholar     | <i>'Age related macular degeneration' [all in title] AND 'adherence' OR 'compliance' OR 'persistence' OR 'discontinuation'[keyword] excluding 'dry' OR 'intermediate'[keyword]</i>                                                                                                                                                                                                                                                                                                                                                                                                                                                                                                                                                                                                                                                                                                                                                                                        |
