# Supplementary material
Source: PubMed Central journal article supplement (PMC7403101)
Supplement: mmc2.pdf [file mmc2.pdf]

eTable 2. Data extraction form for eligible studies

| <b>Study (Reference):</b>                   |  |
|---------------------------------------------|--|
| Study drug(s)                               |  |
| Treatment schedule                          |  |
| Study design                                |  |
| Follow-up duration                          |  |
| <b>Population</b>                           |  |
| Sample size                                 |  |
| Age of patients, years                      |  |
| Baseline visual acuity                      |  |
| <b>Adherence/Persistence evaluation</b>     |  |
| Definitions of nonadherence/non-persistence |  |
| Condition-related factors                   |  |
| Patient-related factors                     |  |
| Therapy-related factors                     |  |
| Health systems/health care team-factors     |  |
| Social/economic factors                     |  |
