# Supplementary material
Source: PubMed Central journal article supplement (PMC7403101)
Supplement: mmc3.pdf [file mmc3.pdf]

eTable 3. Period of treatment or initiation of treatment of patients enrolled in the studies

|                        | 2006                                    | 2007             | 2008                                       | 2009 | 2010             | 2011             | 2012                                 | 2013                                           | 2014             | 2015   | 2016                           | 2017 | 2018 |
|------------------------|-----------------------------------------|------------------|--------------------------------------------|------|------------------|------------------|--------------------------------------|------------------------------------------------|------------------|--------|--------------------------------|------|------|
| Curtis 2012            | Pegaptanib, bevacizumab, ranibizumab/NR |                  |                                            |      |                  |                  |                                      |                                                |                  |        |                                |      |      |
| Lad 2014               | Bevacizumab, ranibizumab/NR             |                  |                                            |      |                  |                  |                                      |                                                |                  |        |                                |      |      |
| Boulanger-Scemama 2015 | Ranibizumab/ PRN                        |                  |                                            |      |                  |                  |                                      |                                                |                  |        |                                |      |      |
| Nunes 2010             | Bevacizumab/ NR                         |                  |                                            |      |                  |                  |                                      |                                                |                  |        |                                |      |      |
| Oishi 2011             |                                         |                  | Ranibizumab/ PRN                           |      |                  |                  |                                      |                                                |                  |        |                                |      |      |
| Vaze 2014              | Ranibizumab/ NR                         |                  |                                            |      |                  |                  |                                      |                                                |                  |        |                                |      |      |
| Rasmussen 2013         | Ranibizumab/ PRN                        |                  |                                            |      |                  |                  |                                      |                                                |                  |        |                                |      |      |
| Kruger Falk 2013       |                                         | Ranibizumab/ PRN |                                            |      |                  |                  |                                      |                                                |                  |        |                                |      |      |
| Ramakrishnan 2020      |                                         |                  | Bevacizumab or Ranibizumab/ PRN or monthly |      |                  |                  |                                      |                                                |                  |        |                                |      |      |
| McGrath 2013           |                                         |                  | Ranibizumab/ T&E                           |      |                  |                  |                                      |                                                |                  |        |                                |      |      |
| Holz 2015              |                                         |                  | Ranibizumab/ NR                            |      |                  |                  |                                      |                                                |                  |        |                                |      |      |
| Polat 2017             |                                         |                  |                                            |      | Ranibizumab/ PRN |                  |                                      |                                                |                  |        |                                |      |      |
| Kim 2017               |                                         |                  |                                            |      |                  |                  | Ranibizumab, bevacizumab/ PRN        |                                                |                  |        |                                |      |      |
| Subhi 2017             |                                         |                  |                                            |      |                  | Ranibizumab/ PRN |                                      |                                                | Aflibercept/ PRN |        |                                |      |      |
| Bobykin 2014           |                                         |                  |                                            |      |                  |                  | Ranibizumab/ PRN                     |                                                |                  |        |                                |      |      |
| Ehikeh 2018a           |                                         |                  |                                            |      |                  |                  | Bevacizumab, ranibizumab/ fixed, PRN |                                                |                  |        |                                |      |      |
| Ehiken, 2018           |                                         |                  |                                            |      |                  |                  |                                      | Ranibizumab, aflibercept, bevacizumab/ PRN     |                  |        |                                |      |      |
| Rasmussen 2017         |                                         |                  |                                            |      |                  |                  | Ranibizumab/ PRN                     |                                                | Aflibercept/ PRN |        |                                |      |      |
| Husler 2013            |                                         |                  |                                            |      |                  |                  | Ranibizumab/ NR                      |                                                |                  |        |                                |      |      |
| Varano 2015            |                                         |                  |                                            |      |                  |                  | NR/ NR                               |                                                |                  |        |                                |      |      |
| Heimes 2016            |                                         |                  |                                            |      |                  |                  |                                      | Ranibizumab/ PRN                               |                  |        |                                |      |      |
| Massamba 2015          |                                         |                  |                                            |      |                  |                  |                                      | Ranibizumab/ PRN                               |                  |        |                                |      |      |
| Krivosic 2017          |                                         |                  |                                            |      |                  |                  |                                      | Ranibizumab or Aflibercept/PRN, T&E, bimonthly |                  |        |                                |      |      |
| Westborg 2018          |                                         |                  |                                            |      |                  |                  |                                      | Ranibizumab (T&E/ Aflibercept (fixed)          |                  |        |                                |      |      |
| Jansen 2018            |                                         |                  |                                            |      |                  |                  |                                      | NR/NR                                          |                  |        |                                |      |      |
| Wintergerst 2018       |                                         |                  |                                            |      |                  |                  |                                      |                                                |                  | NR/ NR |                                |      |      |
| Obeid 2018             |                                         |                  |                                            |      |                  |                  |                                      |                                                |                  | NR/ NR |                                |      |      |
| Angermann 2019         |                                         |                  |                                            |      |                  |                  |                                      |                                                |                  |        | Ranibizumab or Aflibercept/PRN |      |      |

PRN: Pro-re-nata; NR: Not reported; T&E: treat and extend
