# Supplementary material
Source: PubMed Central journal article supplement (PMC7403101)
Supplement: mmc4.pdf [file mmc4.pdf]

eTable 4. Quality assessment of included studies using Mixed Methods Assessment Tool

|                        | 1. Qualitative |     |     |     |     | 4. Quantitative |     |     |     |     | 5. Mixed methods |     |     |     |     |
|------------------------|----------------|-----|-----|-----|-----|-----------------|-----|-----|-----|-----|------------------|-----|-----|-----|-----|
|                        | 1.1            | 1.2 | 1.3 | 1.4 | 1.5 | 4.1             | 4.2 | 4.3 | 4.4 | 4.5 | 5.1              | 5.2 | 5.3 | 5.4 | 5.5 |
| Nunes 2010             | Yes            | *   | No  | No  | No  | Yes             | Yes | Yes | No  | No  | Yes              | No  | No  | *   | No  |
| Oishi 2011             | Yes            | *   | No  | No  | No  | Yes             | Yes | Yes | No  | Yes | Yes              | Yes | No  | *   | No  |
| Droege 2013            | Yes            | Yes | No  | Yes | Yes |                 |     |     |     |     |                  |     |     |     |     |
| Husler 2013            | Yes            | Yes | Yes | No  | No  |                 |     |     |     |     |                  |     |     |     |     |
| Kruger Falk 2013       | Yes            | *   | No  | No  | No  | Yes             | No  | No  | No  | Yes | Yes              | No  | No  | No  | No  |
| McGrath 2013           | Yes            | No  | No  | Yes | Yes | Yes             | Yes | Yes | No  | No  | Yes              | Yes | No  | No  | No  |
| Rasmussen 2013         | Yes            | No  | No  | No  | No  | Yes             | Yes | Yes | No  | Yes | Yes              | No  | No  | *   | No  |
| Bobykin 2014           | No             | No  | No  | No  | No  | Yes             | Yes | Yes | No  | No  | Yes              | No  | No  | No  | No  |
| Vaze 2014              | Yes            | No  | No  | Yes | No  |                 |     |     |     |     |                  |     |     |     |     |
| Boulanger-Scemama 2015 | Yes            | *   | Yes | No  | No  | Yes             | Yes | No  | No  | No  | Yes              | Yes | Yes | *   | Yes |
| Holz 2015              |                |     |     |     |     | Yes             | No  | No  | No  | No  |                  |     |     |     |     |
| Massamba 2015          |                |     |     |     |     | Yes             | Yes | No  | No  | No  |                  |     |     |     |     |
| Varano 2015            | Yes            | Yes | No  | No  | Yes |                 |     |     |     |     |                  |     |     |     |     |
| Heimes 2016            | Yes            | *   | No  | Yes | No  | Yes             | No  | Yes | No  | No  | Yes              | No  | No  | No  | No  |
| Kim 2017               |                |     |     |     |     | Yes             | Yes | No  | Yes | Yes |                  |     |     |     |     |
| Polat 2017             | Yes            | Yes | No  | No  | No  | Yes             | Yes | Yes | No  | No  | Yes              | Yes | No  | *   | No  |
| Rasmussen 2017         |                |     |     |     |     | No              | Yes | No  | No  | No  |                  |     |     |     |     |
| Subhi 2017             |                |     |     |     |     | Yes             | No  | No  | Yes | Yes |                  |     |     |     |     |
| Boyle 2018             | Yes            | Yes | Yes | No  | Yes |                 |     |     |     |     |                  |     |     |     |     |
| Ehlken. 2018           | No             | No  | Yes | Yes | No  | No              | No  | Yes | No  | Yes | Yes              | No  | No  | No  | No  |
| Ehlken. 2018a          | Yes            | Yes | Yes | Yes | Yes | Yes             | Yes | Yes | No  | Yes | Yes              | Yes | Yes | *   | Yes |
| Obeid 2018             |                |     |     |     |     | Yes             | No  | Yes | No  | Yes |                  |     |     |     |     |
| Ozturk 2018            | Yes            | No  | No  | No  | No  | Yes             | Yes | Yes | No  | No  | Yes              | No  | No  | *   | No  |
| Sii 2018               | Yes            | Yes | No  | Yes | Yes |                 |     |     |     |     |                  |     |     |     |     |
| Westborg 2018          |                |     |     |     |     | Yes             | Yes | No  | No  | Yes |                  |     |     |     |     |
| Wintergerst 2018       | Yes            | Yes | Yes | Yes | Yes | Yes             | Yes | Yes | No  | *   | Yes              | Yes | Yes | Yes | Yes |
| Lad 2014               |                |     |     |     |     | Yes             | No  | Yes | No  | Yes |                  |     |     |     |     |
| Krivosic 2017          |                |     |     |     |     | No              | No  | Yes | No  | No  |                  |     |     |     |     |
| Jansen 2018            | No             | No  | No  | Yes | Yes |                 |     |     |     |     |                  |     |     |     |     |
| Angermann 2019         |                |     |     |     |     | Yes             | Yes | No  | No  | Yes |                  |     |     |     |     |
| Ramakrishnan 2020      |                |     |     |     |     | No              | No  | Yes | Yes | Yes |                  |     |     |     |     |
| Curtis 2012            |                |     |     |     |     | Yes             | No  | Yes | No  | Yes |                  |     |     |     |     |

\*: Not known or insufficient detail to assess criterion
