# Supplementary material
Source: PubMed Central journal article supplement (PMC7403101)
Supplement: mmc5.pdf [file mmc5.pdf]

eTable 5. Characteristics of surveys identified in qualitative studies

|                            | Survey Format                     | Respondent              | Administration    | Open-ended questions | Validation                            |
|----------------------------|-----------------------------------|-------------------------|-------------------|----------------------|---------------------------------------|
| Krivosic 2019              | Questionnaire                     | Patient                 | Unknown           | Closed               | None                                  |
| Jansen 2018                | Questionnaire                     | Physician               | Self-administered | Closed               | None                                  |
| Varano 2015                | Questionnaire                     | Patients and caretakers | Self-administered | Closed               | None                                  |
| Droege 2014                | Questionnaire                     | Patients                | Face-to-face      | Closed               | Internal validation of 5 patients     |
| Iida 2016                  | Interviews                        | Physicians              | Face-to-face      | Open                 | None                                  |
| Spooner 2018               | Mixed interview and questionnaire | Patients                | Face-to-face      | Open                 | Validated questionnaires              |
| Hanemoto 2018 <sup>7</sup> | Questionnaire                     | Patients and caretakers | Self-administered | Closed               | Validated questionnaires              |
| McGrath 2013               | Interview                         | Patient                 | Telephone         | Open                 | None                                  |
| Sii 2018                   | Questionnaire                     | Patient                 | Face-to-face      | Closed               | Modified from validated questionnaire |
| Boulanger-Scemama 2015     | Questionnaire                     | Patient                 | Telephone         | Closed               | None                                  |
| Kruger Falk 2013           | Interview                         | Patient                 | Unknown           | Unknown              | None                                  |
| Boyle 2018                 | Mixed interview and survey        | Patient                 | Face-to-face      | Open + closed        | Validated questionnaire               |
| Nunes 2010                 | Questionnaire                     | Patient                 | Telephone         | Closed               | None                                  |
| Husler 2013                | Interview                         | Patient                 | Telephone         | Open                 | Internal validation of 5 volunteers   |
| Polat 2017                 | Interview                         | Patient or caretaker    | Telephone         | Open                 | None                                  |
| Wintergast 2018            | Interview                         | Patient                 | Telephone         | Unknown              | None                                  |
| Ehlken 2018                | Questionnaire                     | Patient                 | Telephone         | Unknown              | None                                  |
| Droege 2013                | Questionnaire                     | Patient                 | Face-to-face      | Closed               | None                                  |
| Oishi 2011                 | Interview                         | Patient                 | Telephone         | Unknown              | None                                  |
